# Supplementary material for: Study of Activation Energy and Moisture Diffusivity of Various Dipping Solutions of Ivy gourd using Solar Dryer
Source: Research Square preprint supplement (doi:10.21203/rs.3.rs-466551/v2), 2022-05-10
Supplement: Supplementary file 1 [file dcda5e582a98554e94cd40ee.docx]

**Study of Activation Energy and Moisture Diffusivity of Various Dipping Solutions of Ivy gourd using Solar Dryer**

**Elavarasan Elangovan(0000-0002-9001-016X)1, Sendhil Kumar Natarajan (0000-0003-3257-4570)2***

1School of Engineering and Technology, Department of Mechanical Engineering

Dhanalakshmi Srinivasan University, Tiruchirappalli-621112, Tamil Nadu, INDIA.

2Department of Mechanical Engineering, National Institute of Technology Puducherry, Karaikal , U.T of Puducherry, INDIA.

*Corresponding author: Assistant Professor, [sendhil80@nitpy.ac.in](mailto:sendhil80@nitpy.ac.in)

**Graphical Abstract**

**
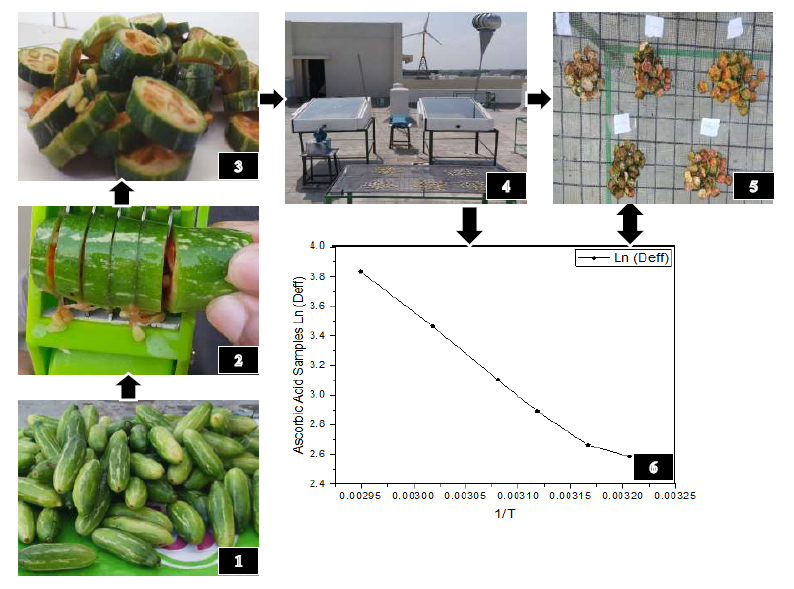
**
